# Supplementary material for: Breast Cancer Patients’ Preferences for Adjuvant Radiotherapy Post Lumpectomy: Whole Breast Irradiation vs. Partial Breast Irradiation—Single Institutional Study
Source: Springer Nature journal article supplement (doi:10.1007/s13187-016-1016-3), 2016-03-15
Supplement: MOESM1 [file 9247420]

**Online Resource 1.** Educational Tool and Questionnaire

### Breast Cancer Patients’ Preferences for Adjuvant Radiotherapy Post-Lumpectomy: Whole Breast Irradiation versus Partial Breast Irradiation – Single Institutional Study

*Journal of Cancer Education*

*Katija Bonin, Merrylee McGuffin, Roseanna Presutti, Tamara Harth, Aruz Mesci, Deb Feldman-Stewart, Edward Chow, Lisa Di Prospero, Danny Vesprini, Eileen Rakovitch, Justin Lee, Lawrence Paszat, Mary Doherty, Hany Soliman, Ida Ackerman, Xingshan Cao, Alex Kiss, Ewa Szumacher*

*Correspondence: Dr. Ewa Szumacher is affiliated with Sunnybrook Health Sciences Center and University of Toronto*

*Email:* [*Ewa.Szumacher@sunnybrook.ca*](mailto:Ewa.Szumacher@sunnybrook.ca)

**Radiation Therapy Options for Women with Early Stage Breast Cancer.**

***Information guide and decision aid.***

Content Editors:

Ewa Szumacher MD, FRCP (C), MEd 1

Decision Aid Format Editors:

¹ Department of Radiation Oncology, Sunnybrook Health Sciences Centre, Toronto, Ontario, Canada

| **DISCLAIMER**  **This information is not intended to replace the advice of a doctor.**  Your oncologist (cancer-doctor) has already recommended the best available radiation therapy option for you after your breast-lump removal (lumpectomy). The purpose of this study is to get a better understanding of what your preference is for radiation therapy after lumpectomy (post-lumpectomy radiation therapy).  You will be given information on the different types of post-lumpectomy radiation therapy options in this information guide, and asked questions about your treatment preference, and why you chose that option.  ***It is very important that you understand that all of the treatment options described in this information guide may not be available to you and that you may not receive your preferred treatment option in the end. However, your preference and opinion on the different treatment options is very important, as it may help make these treatment options more available in the future.***  **The authors disclaim any liability for the decisions you make based solely on this information.** |
| --- |

Version Date: August 14, 2012

**How is early stage breast cancer treated?**

Early stage breast cancers are those of small size and without cancer cells spreading to the lymphatic nodes under the armpit. The primary treatment for this stage is surgery to take out the tumour and some of the normal breast tissue around the area. This procedure is called a lumpectomy. After a lumpectomy it is normal practice to have radiation therapy to lower the risk of the breast cancer recurring in the breast. Since a 1cm tumour represents about a billion cells, some may have been missed during surgery. The purpose of radiation therapy to the breast is to destroy cancer cells that may not have been found or taken out during surgery.


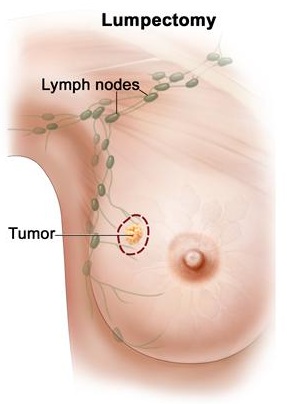


**Breast-conserving surgery.**

The dotted lines show the area of the breast where the tumour is taken out. Some lymph nodes may also be taken out.

**What are my choices for radiation treatment after a lumpectomy? How can I decide?**

If you are a woman who just had a lumpectomy for stage I or II breast cancer, your decision to have radiation treatment willdepend on your situation and your doctor’s advice. You need to know the benefits and the side effects/risks about the different radiation treatment options following a lumpectomy before deciding what you may prefer.

This guide can help you make a choice about the options your doctor has discussed with you for treating your breast cancer after a lumpectomy.

**Which preventive option is best for you?**

**Please indicate the role you would like in deciding about treatment. Check ☑ one**

- You prefer to choose on your own after hearing the views of others
- You prefer to share the choice with: __________________________________
- You prefer someone else to choose for you, namely: ___________________
- You prefer to decide on your own
- You have no preference

**Step 1: Be Clear About the Decision**

##### What are the different radiation therapy options?

There are two different extents of radiation that can be delivered to the breast after lumpectomy:

1. *Whole Breast Radiation*, where the whole breast is treated with radiation. This is the current standard of care for delivering post-lumpectomy radiation therapy.
2. *Partial Breast Radiation*, where only the part of the breast where the tumour was removed receives radiation because this is where most of the breast cancer recurrences occur. This is a newer method of giving post-lumpectomy radiation therapy, introduced in 1992, and it is still being evaluated.

*Radiation therapy can be given using two different techniques:*

1. *External beam radiation* is when a machine is used to deliver external beams of radiation to the breast. Although this treatment is painless, it can produce skin reaction (like sun burns), and although each treatment lasts a few minutes it requires daily sessions over several weeks. *This can be used for both whole breast and partial breast radiation treatment.*
2. *Brachytherapy* is when radioactive sources are placed into the breast in the area where the tumour was removed near the previous tumour location to deliver the radiation treatment. Side effects are limited to the area treated. *This can be used for partial breast radiation treatment.*

**At this point, are you leaning toward a certain option? Check** ☑ **one**

- No, I need more information
- Whole Breast Radiation
- Partial Breast Radiation
- No Radiation
- No preference

**What are the different methods of Whole Breast Radiation?**

For Whole Breast Radiation, external beams of radiation are used to treat the entire breast. All radiation treatments take place during the week at the cancer centre, from Monday to Friday, five days per week, with a break in treatment on Saturday and Sunday.

*There are two different ways that whole breast radiation can be delivered, both of which use external beams of radiation:*

1. *Conventional* whole breast radiation— involves 25-33 once-a-day treatments that each last approximately one hour. In total, this treatment method lasts for about 5-6 consecutive weeks. This method gives a smaller amount of radiation per treatment, but the total radiation is the same as the other method, called hypo-fractionated whole breast radiation. We know more about its long-term effectiveness than hypo-fractionated whole breast radiation because it is an older method.
2. *Hypo-fractionated* (shortened) whole breast radiation— involves 16-21 once-a-day treatments that each last approximately one hour. In total, this method lasts for approximately 4-5 consecutive weeks. This method gives a higher amount of radiation per treatment, but the total radiation is the same as conventional whole breast radiation.

The number of treatments is different between conventional and hypo-fractionated whole breast radiation. **There are several research studies that have shown that both types of whole breast radiation treatments result in the same chance of the cancer returning, overall survival rates and side effects, and are equally effective.**


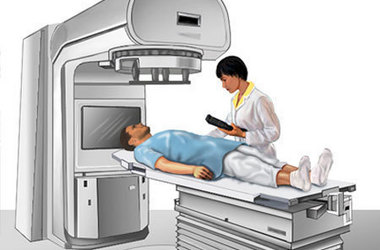


***External Beam Radiation Therapy***

Whole breast radiation and some partial breast radiation techniques are done using external beam radiation therapy.

**What are the different methods of Partial Breast Radiation?**

For Partial Breast Radiation, brachytherapy or external beam radiation is used to treat only the part of the breast where the tumour was removed. All radiation treatments take place during the week at the cancer centre, from Monday to Friday, five days per week, with a break in treatment on Saturday and Sunday.

*The different techniques for partial breast radiation are described below:*

1. *3-Dimensional Conformal External Beam Radiation*—weeks after the tumour is removed, multiple external beams of radiation are used to deliver a very precise amount of radiation to the part of the breast where the tumour used to be sparing normal breast tissue. This involves 10 twice-a-day treatments, with the first treatment in the morning, and the second at least 6 hours later in the afternoon. This treatment method lasts for about 1 week.
2. *Intra-operative Radiation—*immediately after the tumour is removed during the lumpectomy procedure, external beams of radiation are delivered to the part of the breast where the tumour was.
3. *Balloon Brachytherapy*—a balloon is inserted into the part of the breast where the tumour used to be either during or after the lumpectomy procedure, inflated, and a seed that delivers the radiation is put into the balloon. The seed is taken out after a few minutes when the radiation has been given. This involves 10 twice-a-day treatments, with the first treatment in the morning, and the second at least 6 hours later in the afternoon. This treatment method lasts for about 1 week. The balloon is kept in the breast until all treatments are complete. The balloon is then taken out.
4. *Multi-catheter Brachytherapy*—after the lumpectomy, 10-20 flexible tubes called catheters are surgically placed in the breast area where the tumour used to be. Seeds delivering radiation are put into the catheters and taken out after the radiation has been delivered. This involves 10 twice-a-day treatments, with the first treatment in the morning, and the second at least 6 hours later in the afternoon. This treatment method lasts for about 1 week. The catheters stay in the breast until all 10 treatments are complete. The catheters are then taken out.
5. *Permanent Breast Seed Implant Brachytherapy*—weeks after the lumpectomy, in a single 1-hour procedure under local anaesthetic, dozens of radioactive seeds are put into the breast. After the procedure the patient goes home. The seeds are not taken out.

The different partial breast radiation methods are still being researched. **We believe that these methods all have the same treatment outcomes in terms of the chance of the cancer recurring, overall survival rates and side effects.** **
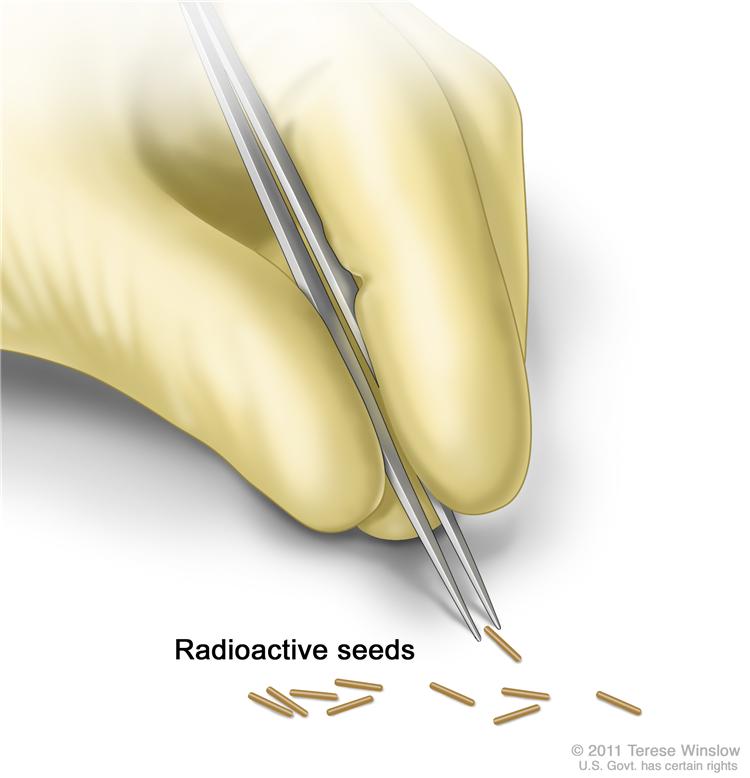
**

***Brachytherapy***

For partial breast radiation, radioactive seeds are inserted into the cavity where the breast tumour used to be. This is done permanently, through a balloon or multiple catheters.

*Here is a picture of all the different types of post-lumpectomy breast radiation and their various methods of delivery:*

**
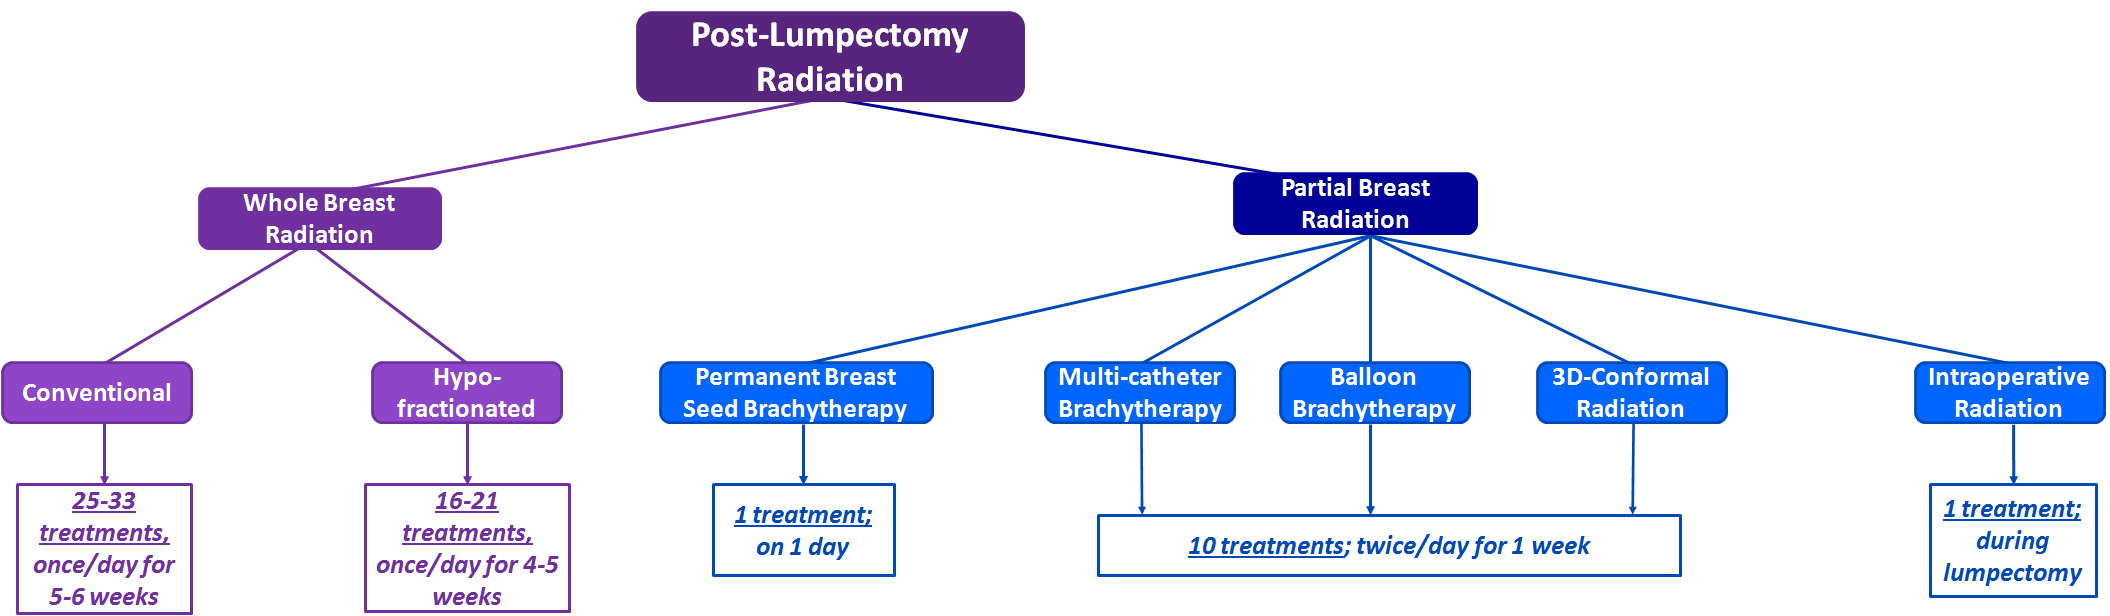
**

**At this point, which option are you leaning towards? Check** ☑ **one**

- I need more information
- Whole Breast Radiation
- Conventional-Fractionated—25-33 daily treatments over 5-6 weeks
- Hypo-fractionated (shortened)—16-21 daily treatments over 4-5 weeks
- No preference
- Partial Breast Radiation
- 3-Dimensional Conformal External Beam Radiation
- Balloon Brachytherapy
- Multi-catheter Brachytherapy
- Permanent Breast Seed Implants
- Intra-operative Radiation
- No preference
- No Radiation
- No preference

**Step 2: Think about the benefits and risks**

**A) What does the research show?**

Blocks of 100 faces show the “best estimate” for what happens to 100 women with early stage breast cancer if they choose one of the treatment options.

Each face (😐) stands for one woman. There is no way of knowing what will happen to you.

Side effects for each treatment option are discussed in the “benefits and risks” chart on page11.

**Treatment Options**

| **Whole Breast Radiation** | **Partial Breast Radiation** | |
| --- | --- | --- |
| **Conventional & Hypo-fractionated** | **3D-Conformal External Beam Radiation** | **Balloon Brachytherapy** |
| 😐😐😐😐😐😐😐😐😐😐😐😐😐😐😐😐😐😐😐😐  😐😐😐😐😐😐😐😐😐😐😐😐😐😐😐😐😐😐😐😐  😐😐😐😐😐😐😐😐😐😐😐😐😐😐😐😐😐😐😐😐  😐😐😐😐😐😐😐😐😐😐😐😐😐😐😐😐😐😐😐😐  😐😐😐😐😐😐😐😐😐😐😐😐😐😐😐😐😐😐😐😐    **98** women may not get a breast  cancer recurrence in the breast that received radiation within 5 years  **2** women may get a breast cancer  recurrence | 😐😐😐😐😐😐😐😐😐😐😐😐😐😐😐😐😐😐😐😐  😐😐😐😐😐😐😐😐😐😐😐😐😐😐😐😐😐😐😐😐  😐😐😐😐😐😐😐😐😐😐😐😐😐😐😐😐😐😐😐😐  😐😐😐😐😐😐😐😐😐😐😐😐😐😐😐😐😐😐😐😐  😐😐😐😐😐😐😐😐😐😐😐😐😐😐😐😐😐😐😐😐  **97** women may not get a breast  cancer recurrence in the breast that received radiation within 5 years  **3** women may get a breast cancer  Recurrence | 😐😐😐😐😐😐😐😐😐😐😐😐😐😐😐😐😐😐😐😐  😐😐😐😐😐😐😐😐😐😐😐😐😐😐😐😐😐😐😐😐  😐😐😐😐😐😐😐😐😐😐😐😐😐😐😐😐😐😐😐😐  😐😐😐😐😐😐😐😐😐😐😐😐😐😐😐😐😐😐😐😐  😐😐😐😐😐😐😐😐😐😐😐😐😐😐😐😐😐😐😐😐  **97** women may not get a breast  cancer recurrence in the breast that received radiation within 5 years  **3** woman may get a breast cancer  Recurrence |

**Treatment Options**

| **Partial Breast Radiation** | | |
| --- | --- | --- |
| **Multi-Catheter Brachytherapy** | **Permanent Breast Seed Implant** | **Intra-Operative** |
| 😐😐😐😐😐😐😐😐😐😐😐😐😐😐😐😐😐😐😐😐  😐😐😐😐😐😐😐😐😐😐😐😐😐😐😐😐😐😐😐😐  😐😐😐😐😐😐😐😐😐😐😐😐😐😐😐😐😐😐😐😐  😐😐😐😐😐😐😐😐😐😐😐😐😐😐😐😐😐😐😐😐  😐😐😐😐😐😐😐😐😐😐😐😐😐😐😐😐😐😐😐😐    **97** women may not get a breast  cancer recurrence in the breast that received radiation within 5 years  **3** women may get a breast cancer  recurrence | 😐😐😐😐😐😐😐😐😐😐😐😐😐😐😐😐😐😐😐😐  😐😐😐😐😐😐😐😐😐😐😐😐😐😐😐😐😐😐😐😐  😐😐😐😐😐😐😐😐😐😐😐😐😐😐😐😐😐😐😐😐  😐😐😐😐😐😐😐😐😐😐😐😐😐😐😐😐😐😐😐😐  😐😐😐😐😐😐😐😐😐😐😐😐😐😐😐😐😐😐😐😐  **97** women may not get a breast  cancer recurrence in the breast that received radiation within 5 years  **3** women may get a breast cancer  recurrence | 😐😐😐😐😐😐😐😐😐😐😐😐😐😐😐😐😐😐😐😐  😐😐😐😐😐😐😐😐😐😐😐😐😐😐😐😐😐😐😐😐  😐😐😐😐😐😐😐😐😐😐😐😐😐😐😐😐😐😐😐😐  😐😐😐😐😐😐😐😐😐😐😐😐😐😐😐😐😐😐😐😐  😐😐😐😐😐😐😐😐😐😐😐😐😐😐😐😐😐😐😐😐  **97** women may not get a breast  cancer recurrence in the breast that received radiation within 5 years  **3** woman may get a breast cancer  recurrence |

**B) What are the benefits and risks of the different radiation therapy options following lumpectomy?**

| **Treatment Option** | **Benefits**  **(Reasons to choose option)** | **Risks/Side Effects**  **(Reasons to avoid option)** |
| --- | --- | --- |
| Whole Breast Radiation | With whole breast radiation there are no additional surgical procedures required for radiation treatment.  This treatment option is the standard radiation treatment for early-stage breast cancer after a lumpectomy, and its long-term effectiveness is well-known. | The length of treatment is longer for whole breast radiation, and requires daily trips to and from the cancer centre for 4-6 consecutive weeks. This can be inconvenient and disrupt daily life. There are also associated transportation costs such as parking expenses that result from a longer treatment duration.  The entire breast receives radiation, so there is a higher dose of radiation delivered to the breast.  Since the entire breast is treated, sometimes the lung or heart may receive some radiation as well.  *Side effects of this treatment may include:*   - Skin irritation, similar to a sunburn, which may cause pain - Breast swelling - Breast tenderness - Fatigue - Change in colour of the breast - Hardening or thickening of the breast and skin |
| **Partial Breast Radiation** | The treatment duration is shorter for partial breast radiation, with either a single treatment on 1 day, or 10 treatments over 1 week.  Only part of the breast receives radiation, so there is a lower dose of radiation delivered to the breast. | All these treatment options are fairly new methods of radiation treatment for early-stage breast cancer after a lumpectomy.  So far, it appears that their long-term effectiveness appears to be the same as whole breast radiation, but the long term results are not yet known.  Partial breast radiation using Brachytherapy requires an additional surgical procedure to deliver the radiation.  *Side effects of this treatment may include:*   - Risk of infection with Brachytherapy techniques - Pain from Brachytherapy procedure - Skin irritation - Fatigue - Breast firmness or shrinkage - Change in colour of the breast - Hardening or thickening of the breast and skin |

**Now that you have reviewed all of the information on the radiation treatment options, which treatment do you prefer? Check** ☑ **one**

- I need more information
- Whole Breast Radiation
- Conventional-Fractionated—25-33 daily treatments over 5-6 weeks
- Hypo-fractionated (shortened)—16-21 daily treatments over 4-5 weeks
- No preference
- Partial Breast Radiation
- 3-Dimensional Conformal External Beam Radiation
- Balloon Brachytherapy
- Multi-catheter Brachytherapy
- Permanent Breast Seed Implants
- Intra-operative Radiation
- No preference
- No Radiation
- No preference

**Step 3: Show the factors that were important for you in making your treatment preference**

| **How Important was each of the following when choosing your treatment option?** | **1** | **2** | **3** | **4** |
| --- | --- | --- | --- | --- |
| **Very Important** | **Quite Important** | **A Little Important** | **Not at All Important** |
| 1. Convenience of treatment (e.g. duration, number of visits to the centre) | 1 | 2 | 3 | 4 |
| 1. financial considerations (such as parking costs, missed work) | 1 | 2 | 3 | 4 |
| 1. The total dose of radiation to the breast | 1 | 2 | 3 | 4 |
| 1. The amount of breast treated | 1 | 2 | 3 | 4 |
| 1. The use of a surgical procedure | 1 | 2 | 3 | 4 |
| 1. The chance of the cancer coming back | 1 | 2 | 3 | 4 |
| 1. The overall survival benefit | 1 | 2 | 3 | 4 |
| 1. Side effects of treatment | 1 | 2 | 3 | 4 |
| 1. Information on long-term effectiveness | 1 | 2 | 3 | 5 |
| 1. That the treatment option be the standard radiation treatment | 1 | 2 | 4 | 5 |
| 1. Amount of radiation to other organs of the body | 1 | 2 | 4 | 5 |

**Are there any other things that are important for you when choosing your treatment option?**

________________________________________________________________________________________________________________________________________________________________________________________________________________________________________________________________________________________________________________________________________________________________________________________________________________________________________________________________________________________________________________________________________________________________________________________
